# Supplementary material for: Metal-mediated base pairing within the simplified nucleic acid GNA
Source: Royal Society of Chemistry journal article supplement (doi:10.1039/b816142a), 2008-12-01
Supplement: b816142a.pdf [file b816142a.pdf]

## **Supplementary Material**

# **Metal-Mediated Base Pairing within the Simplified Nucleic Acid GNA**

**Mark K. Schlegel, Lili Zhang, Nicholas Pagano, and Eric Meggers**

*Fachbereich Chemie, Philipps-Universität Marburg, Hans-Meerwein Strasse, D-35043 Marburg,*

*Germany*

### **Content:**

- 1.) Proton NMR data of compounds
- 2.) GNA oligonucleotide synthesis and purification

## 1.) Proton NMR data of compounds

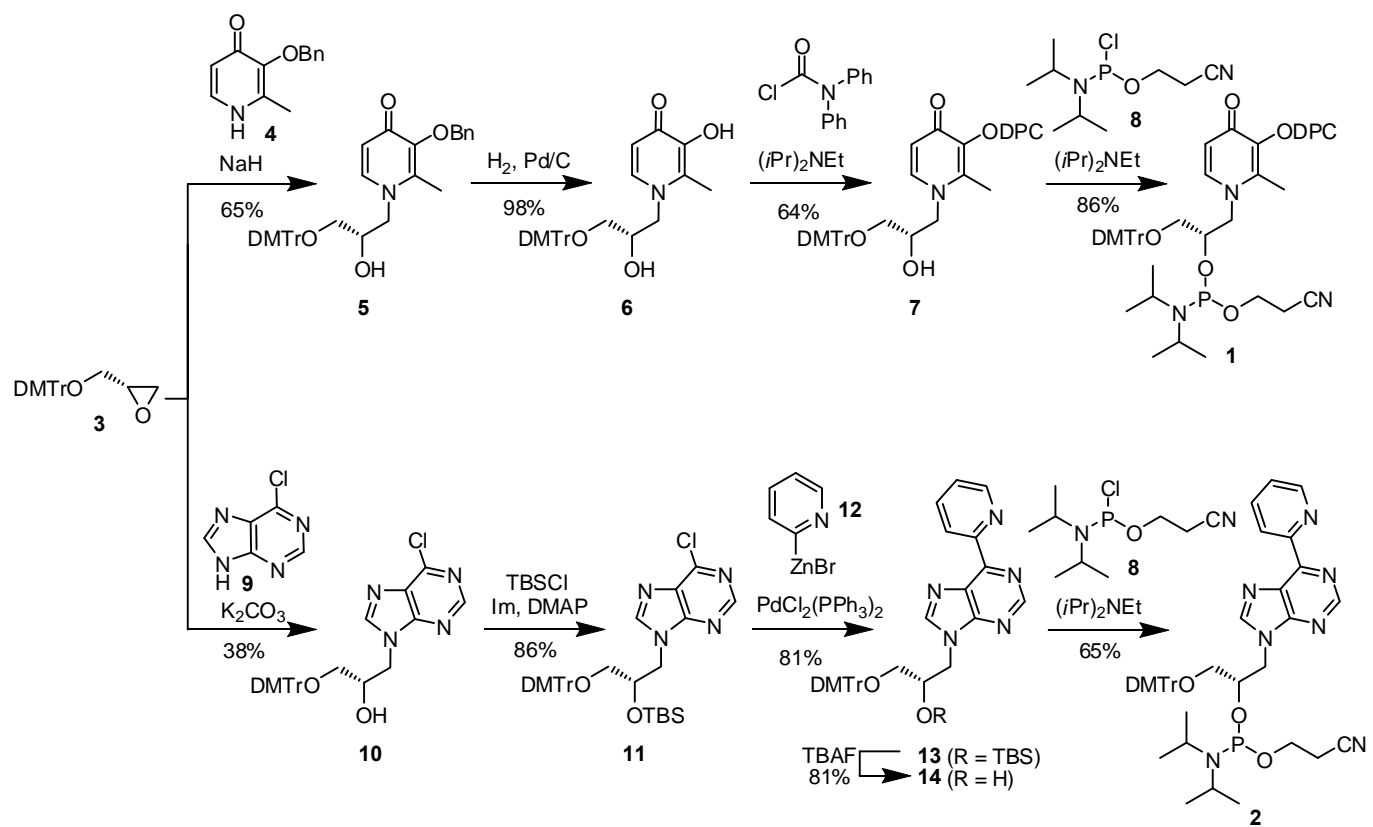

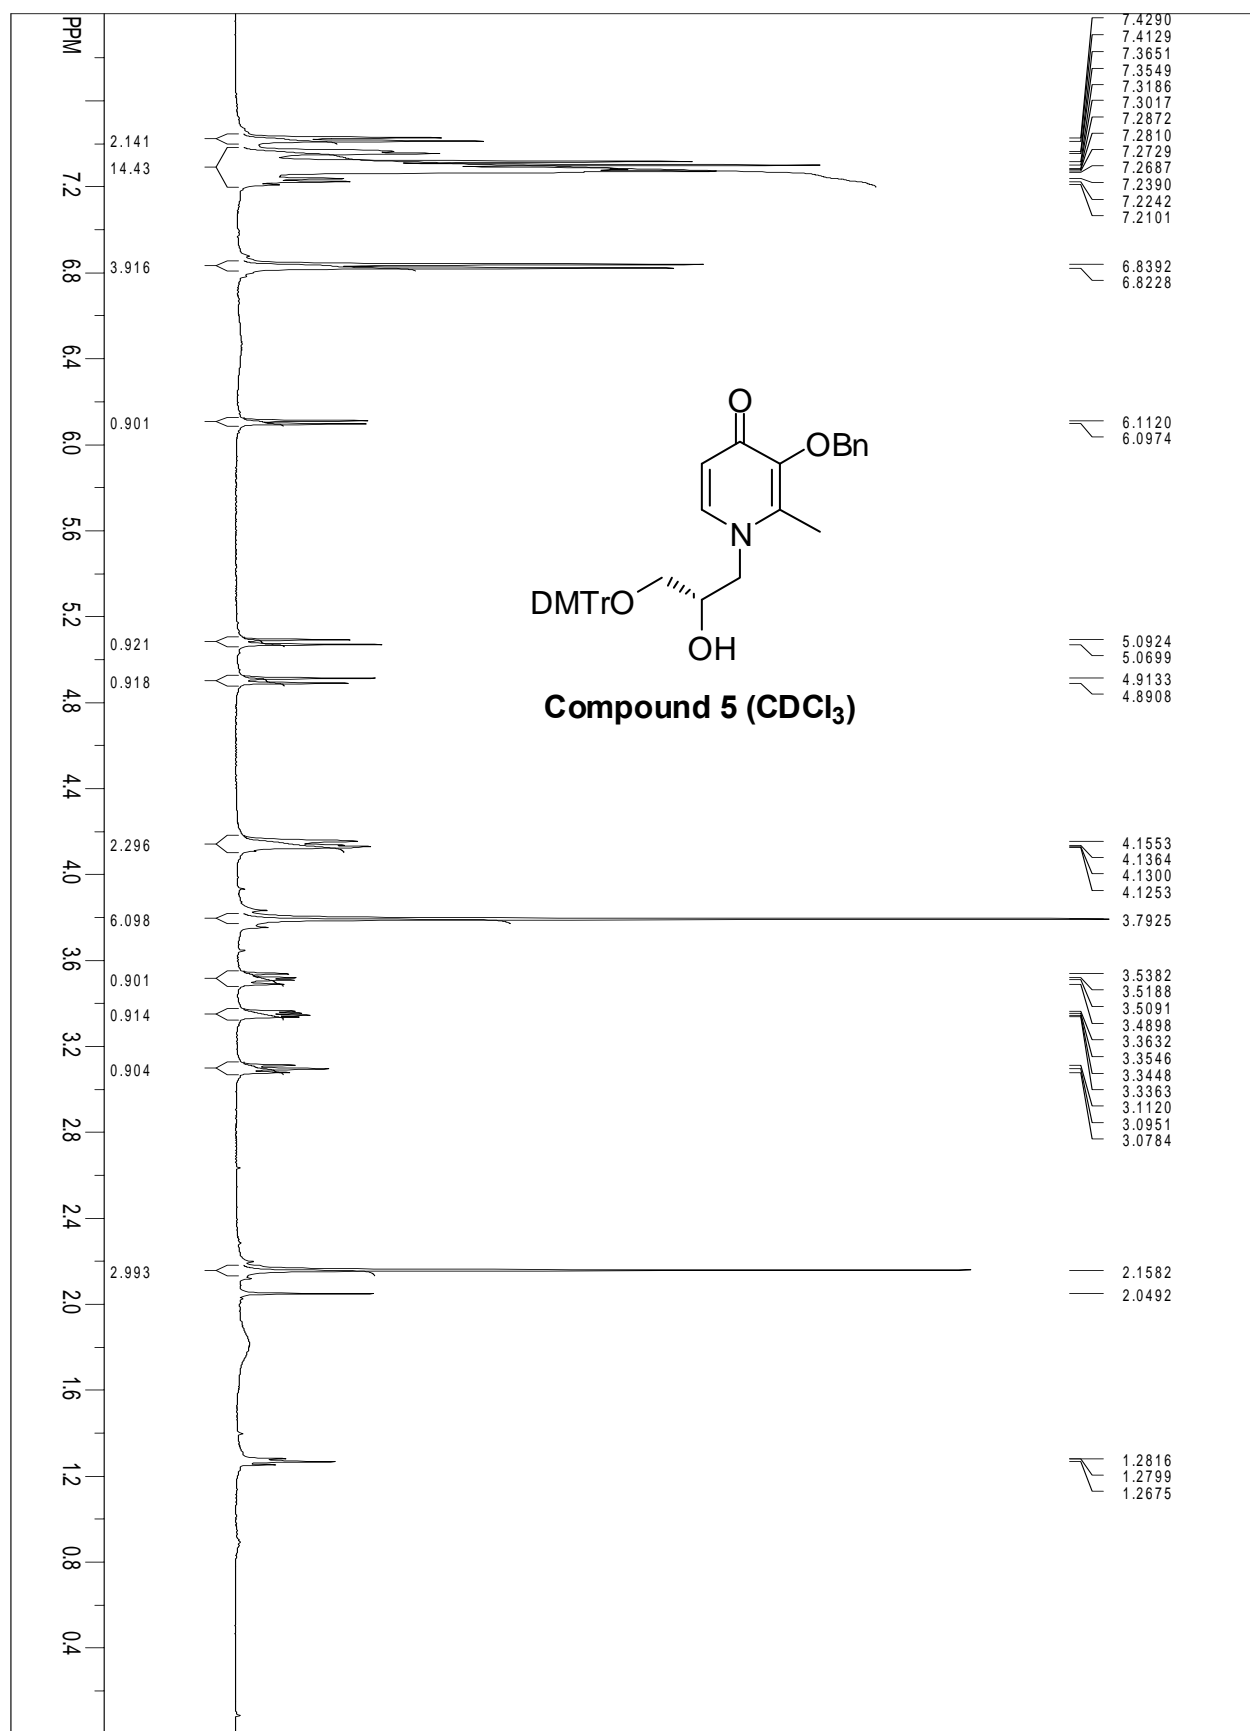

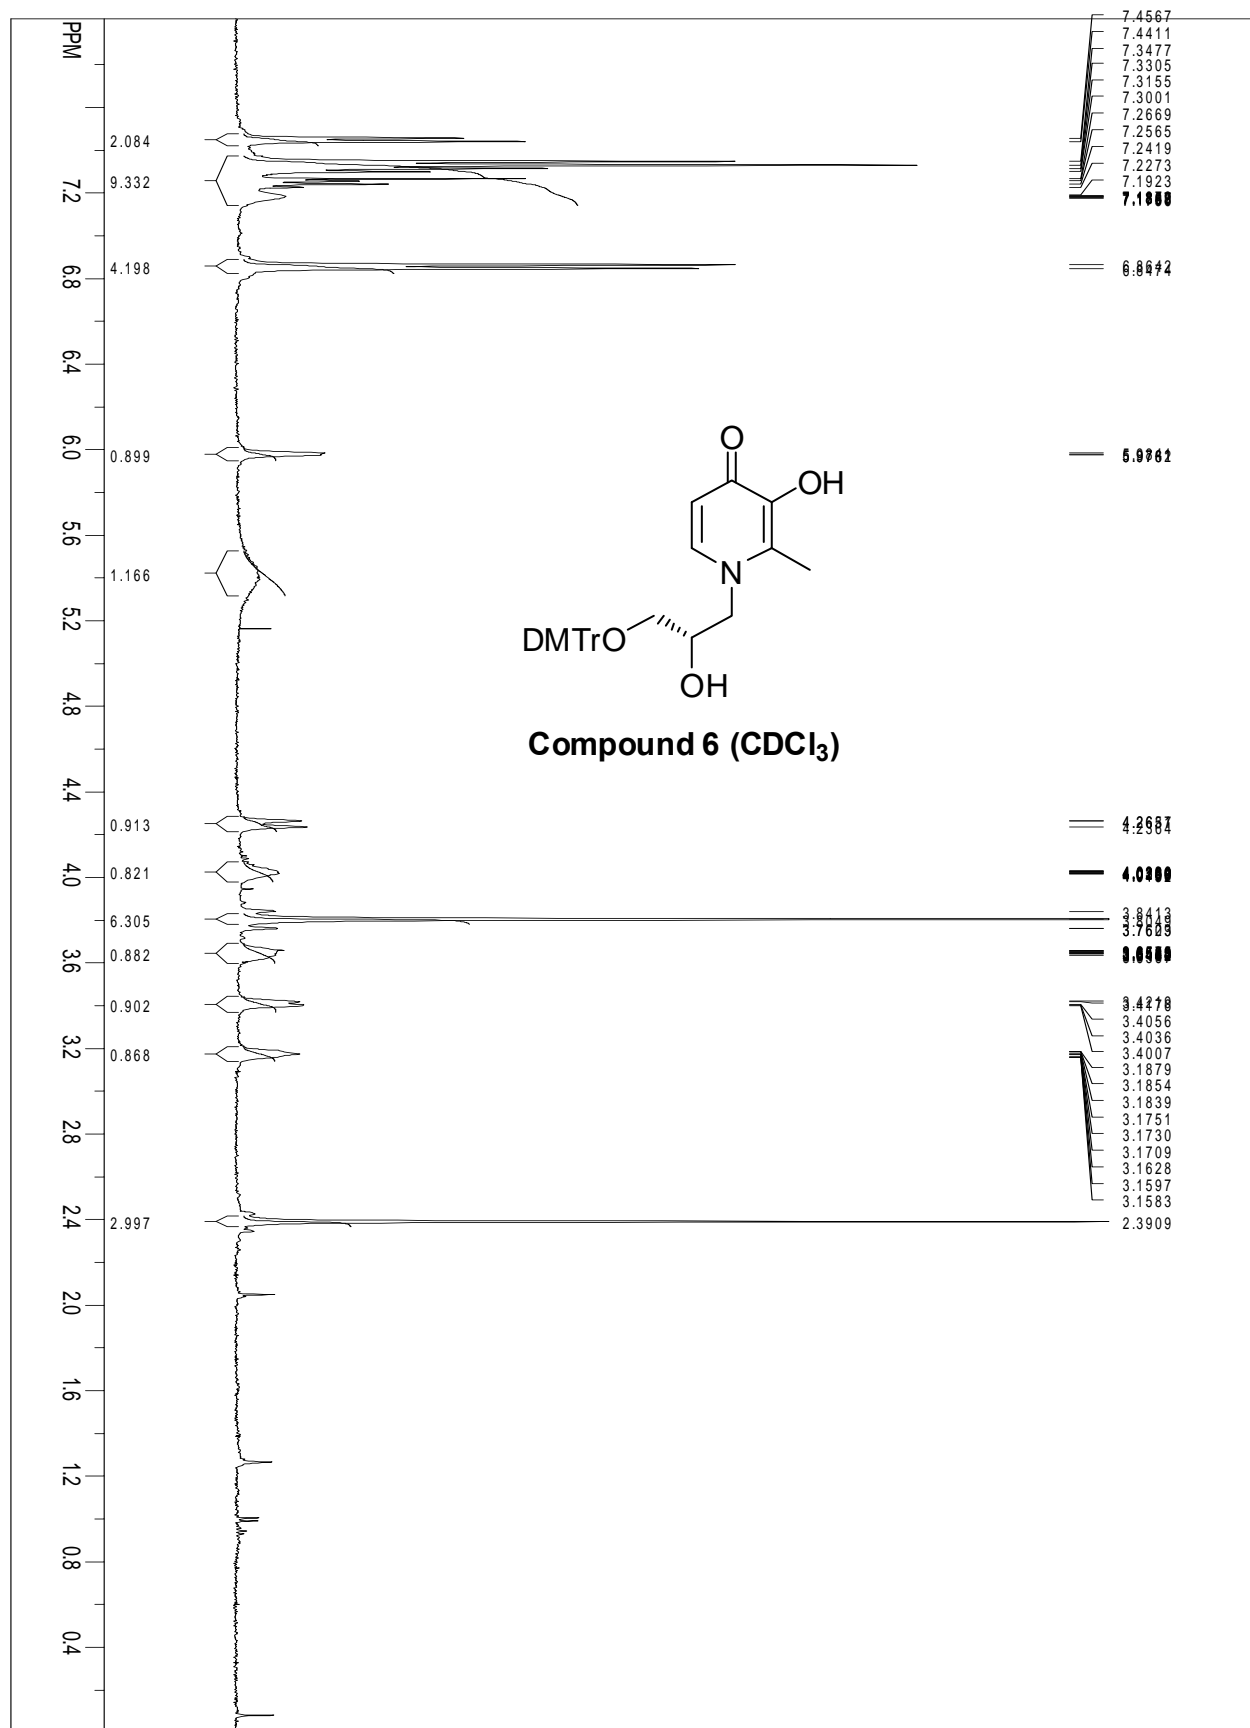

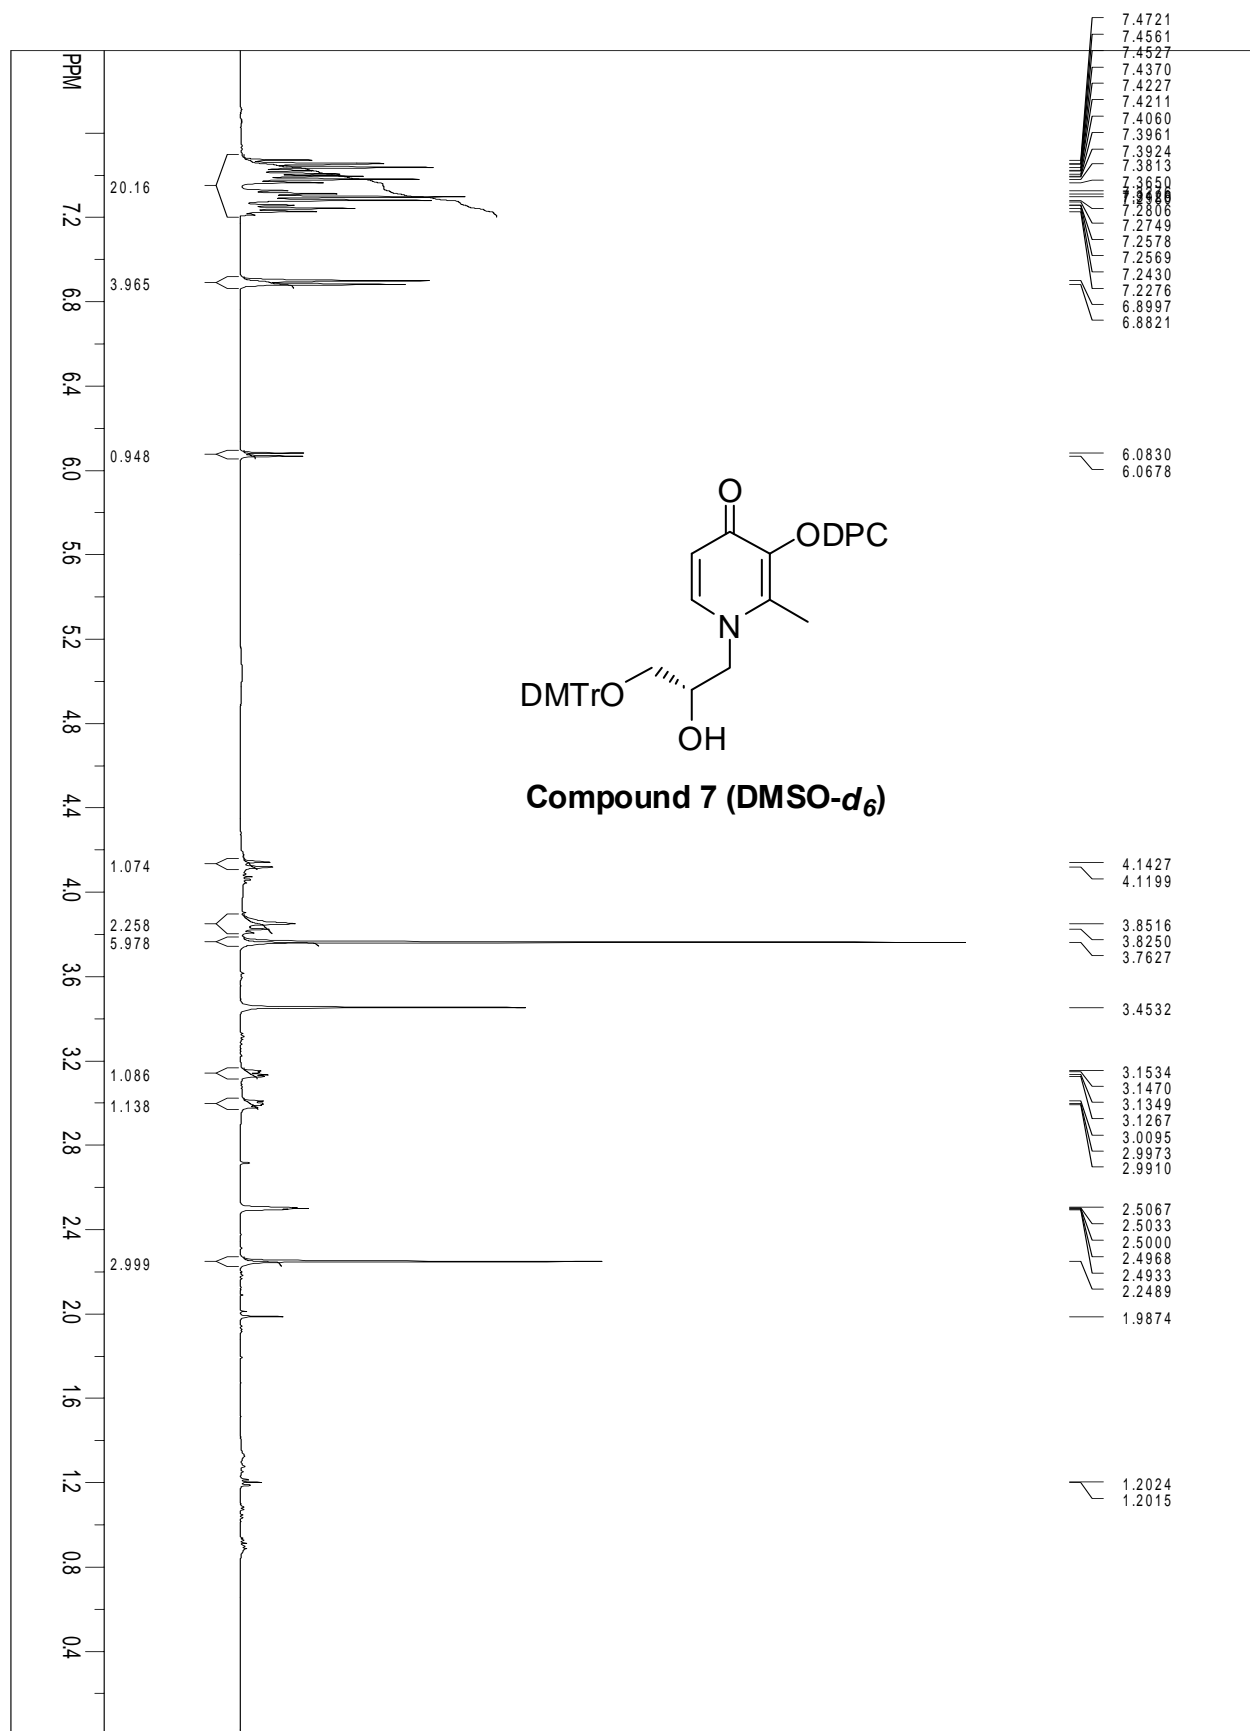

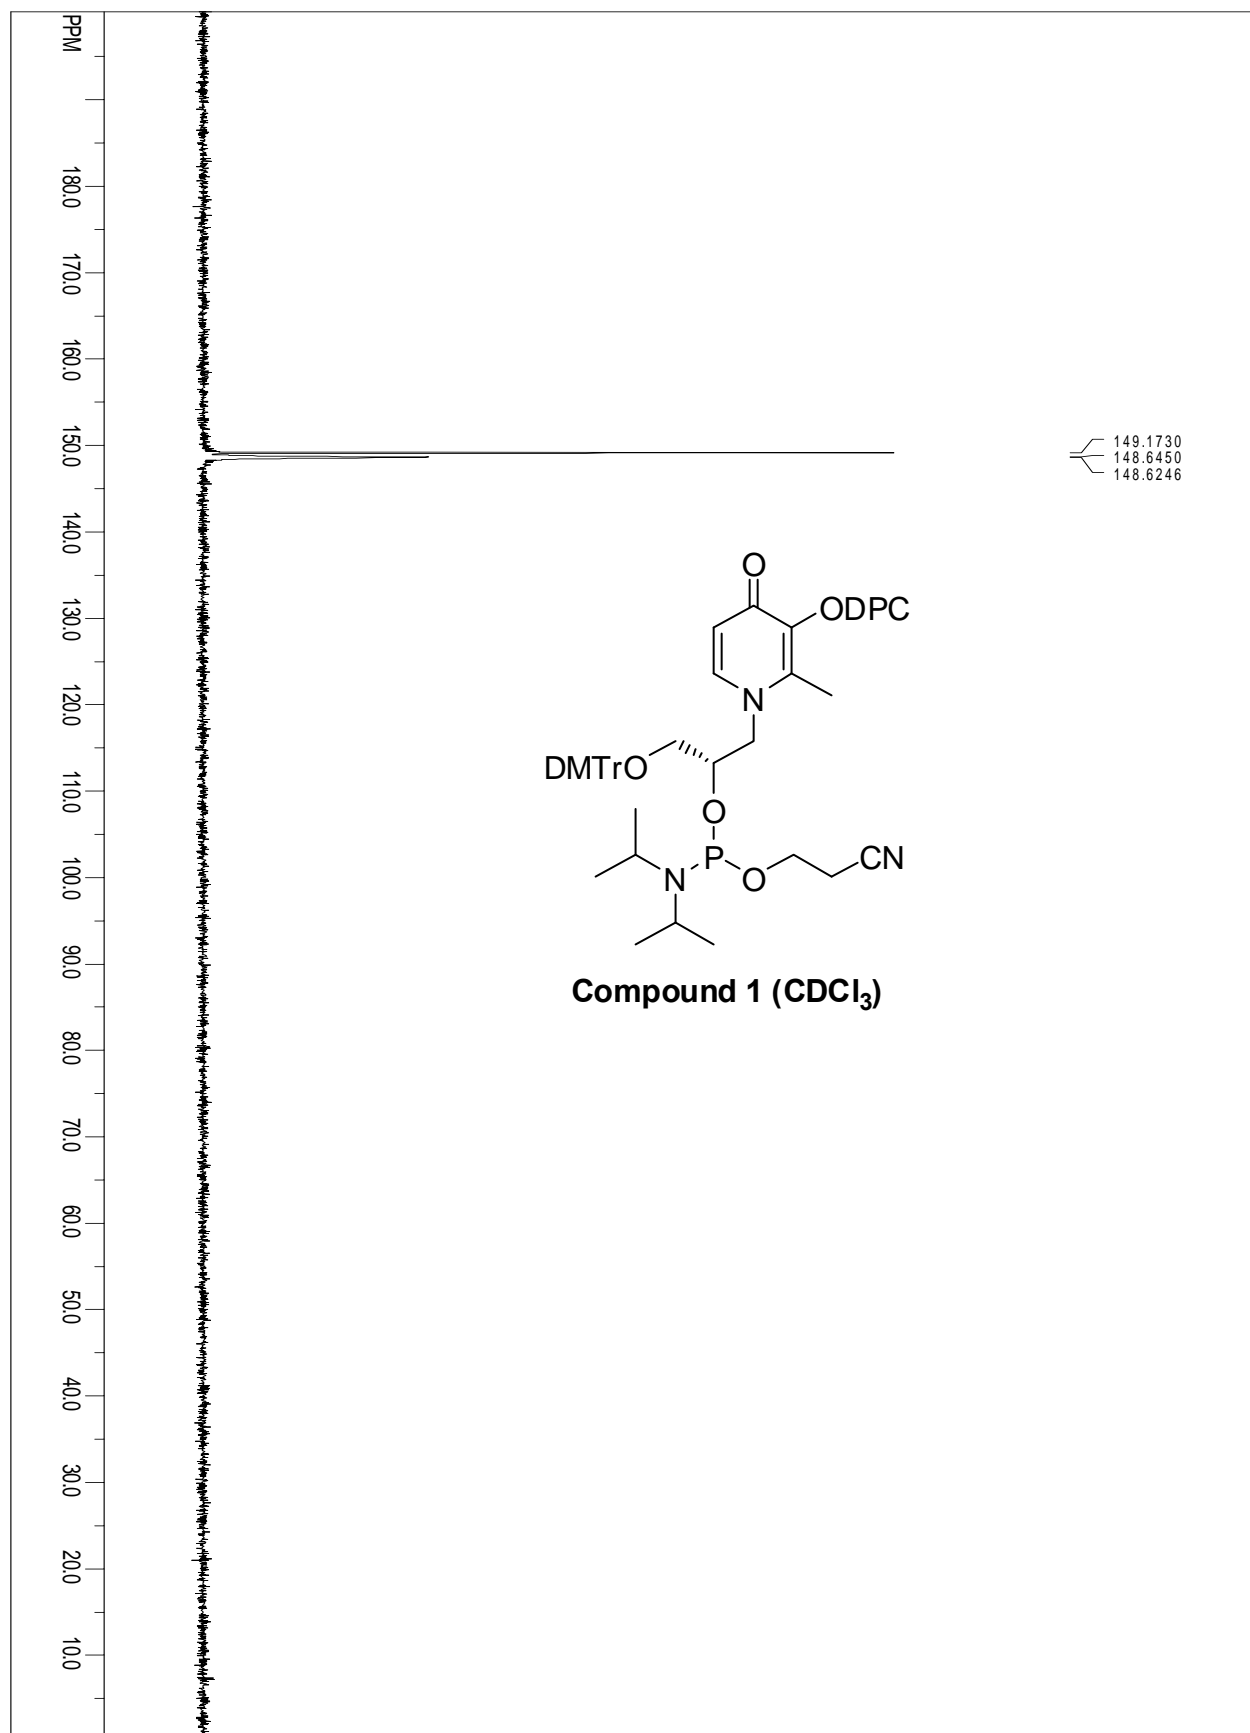



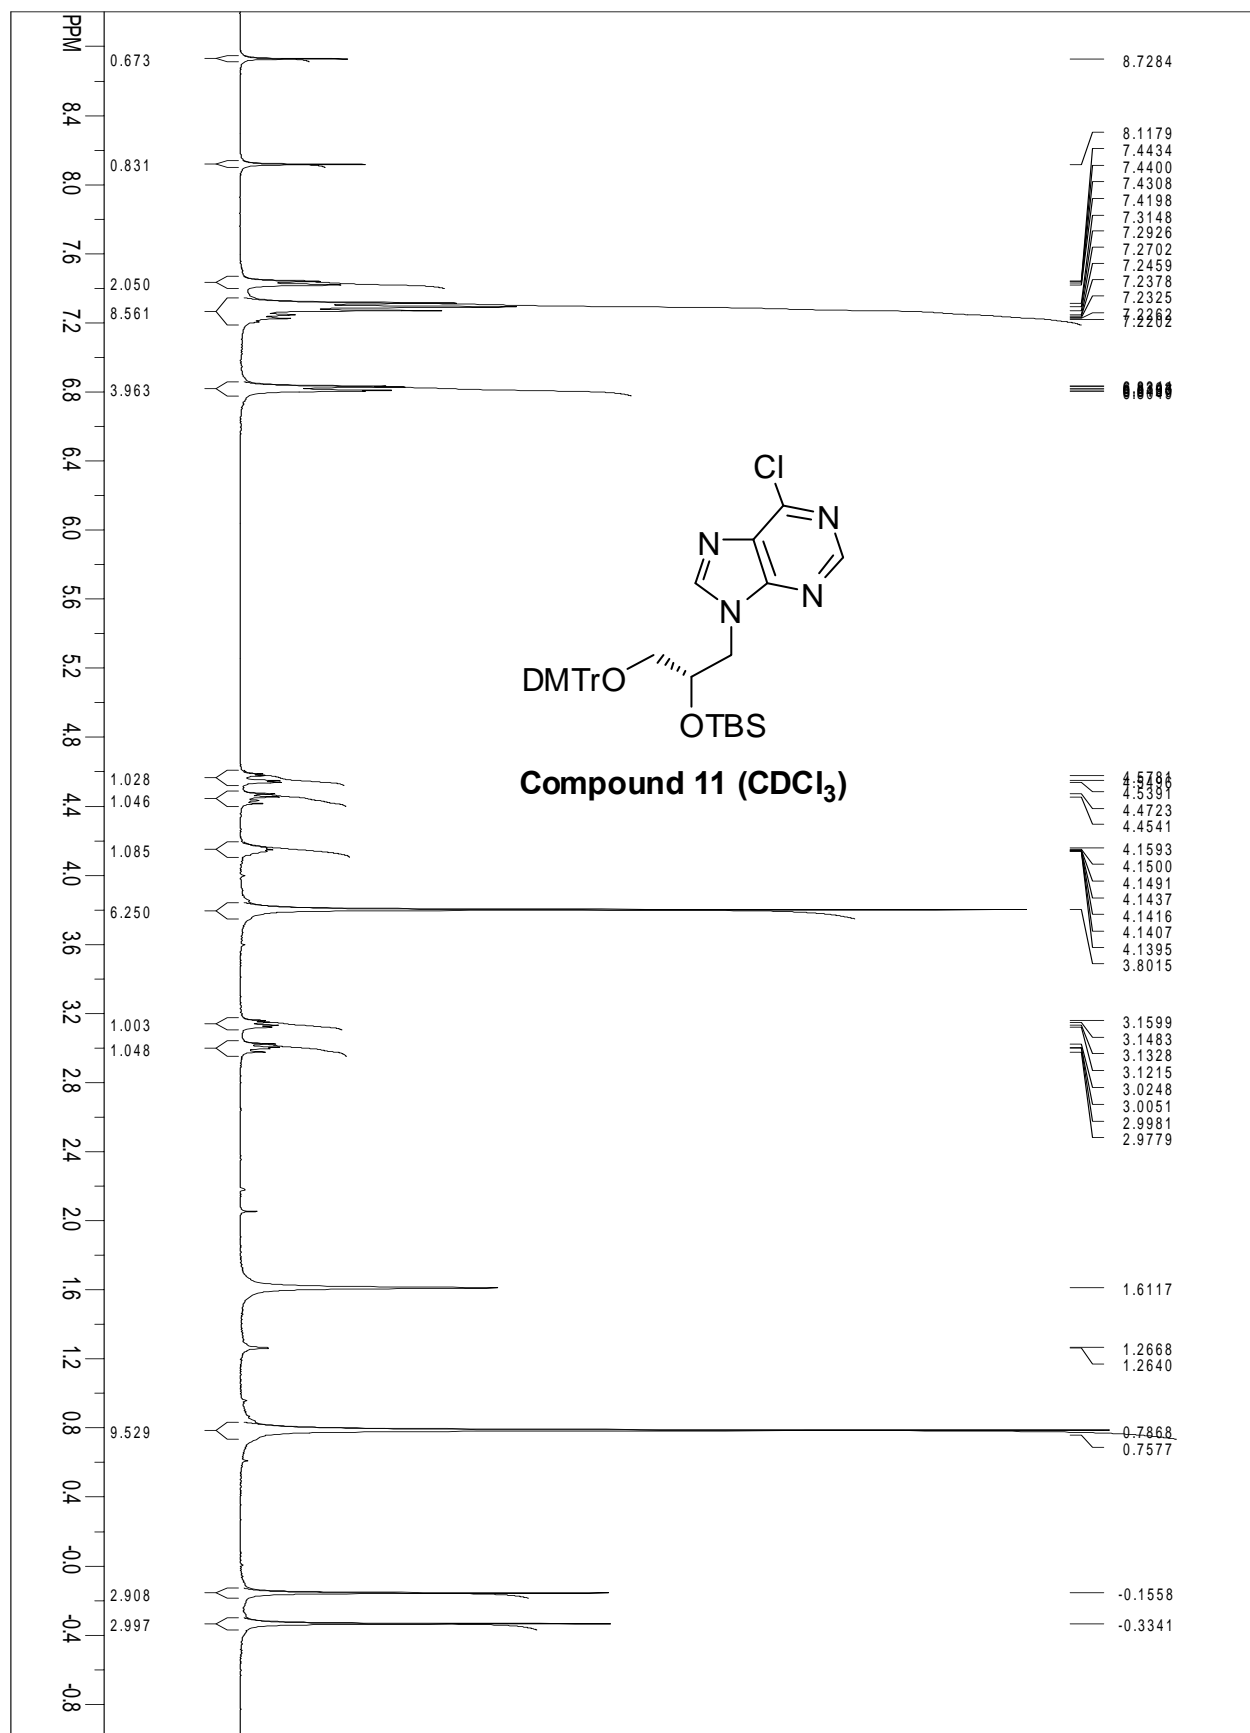





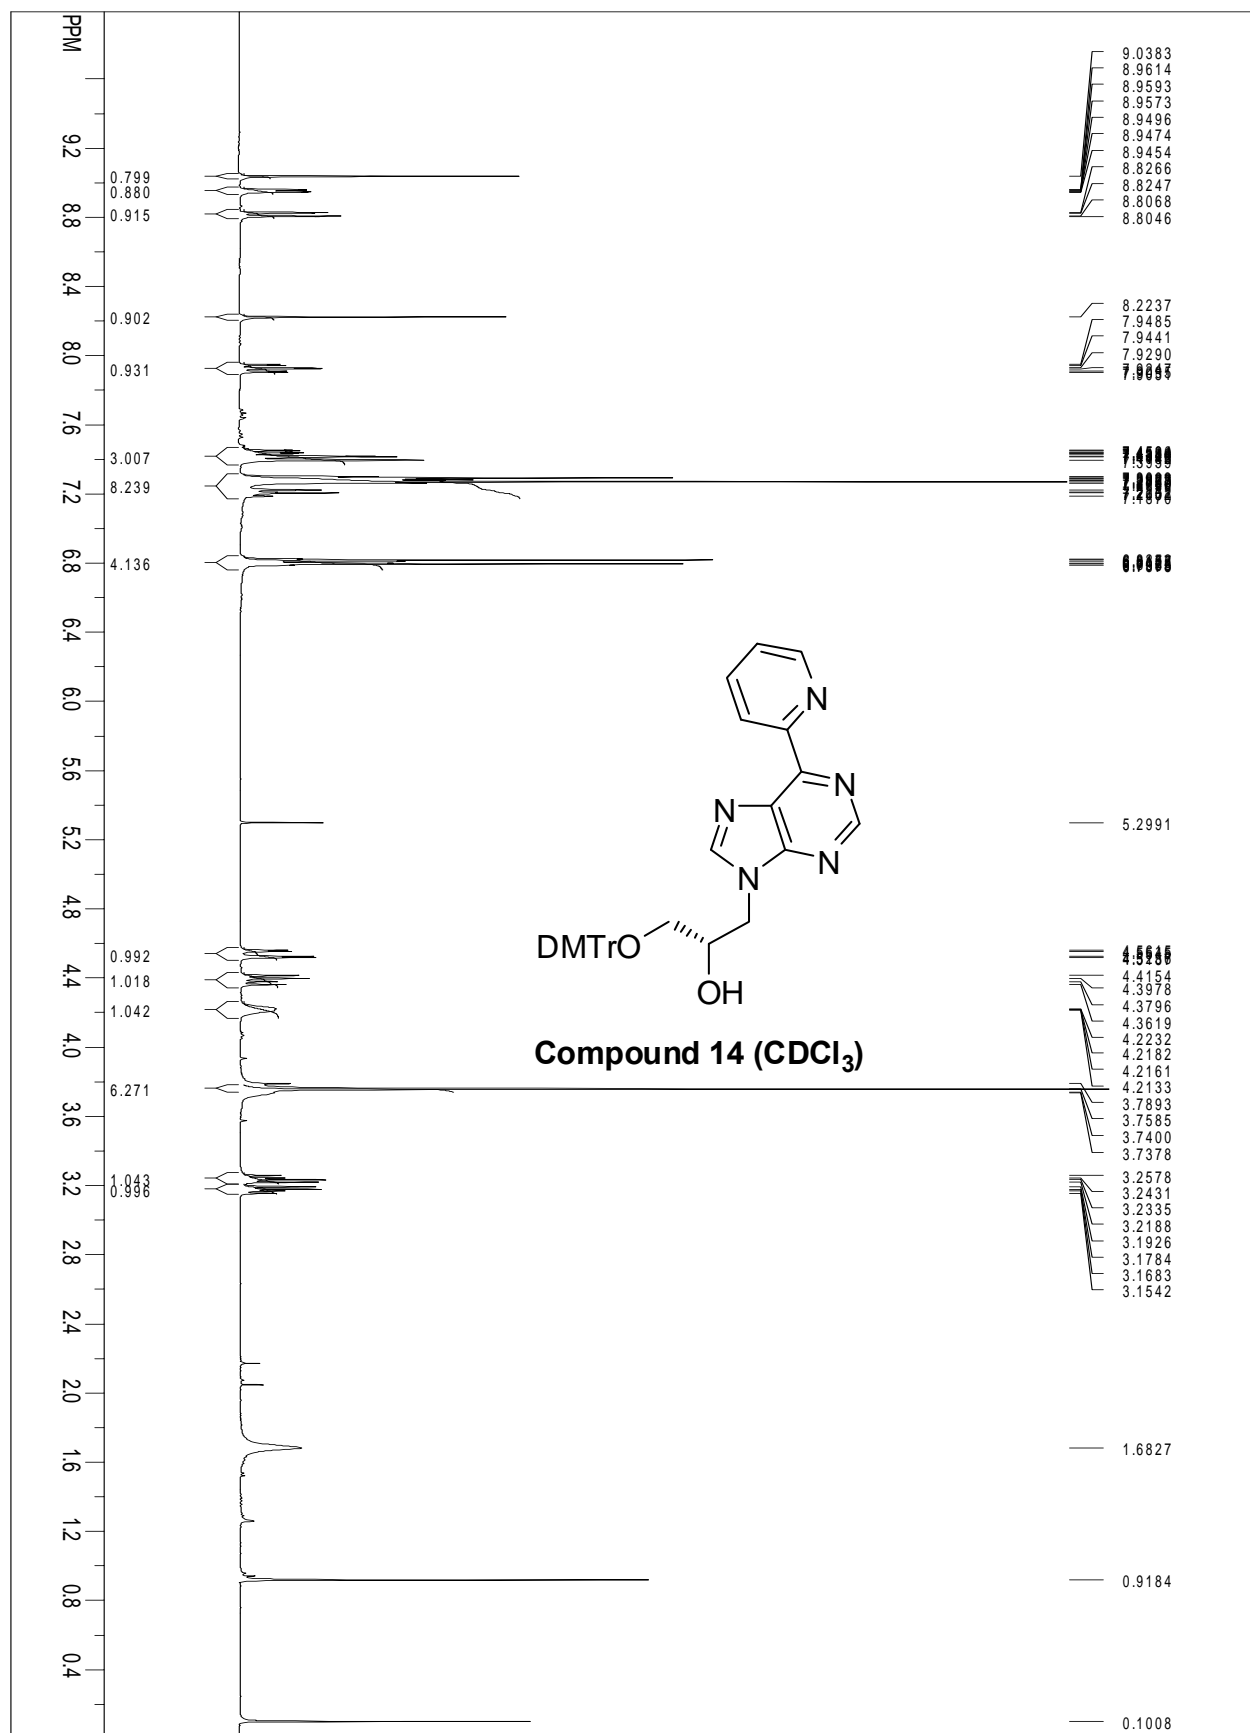

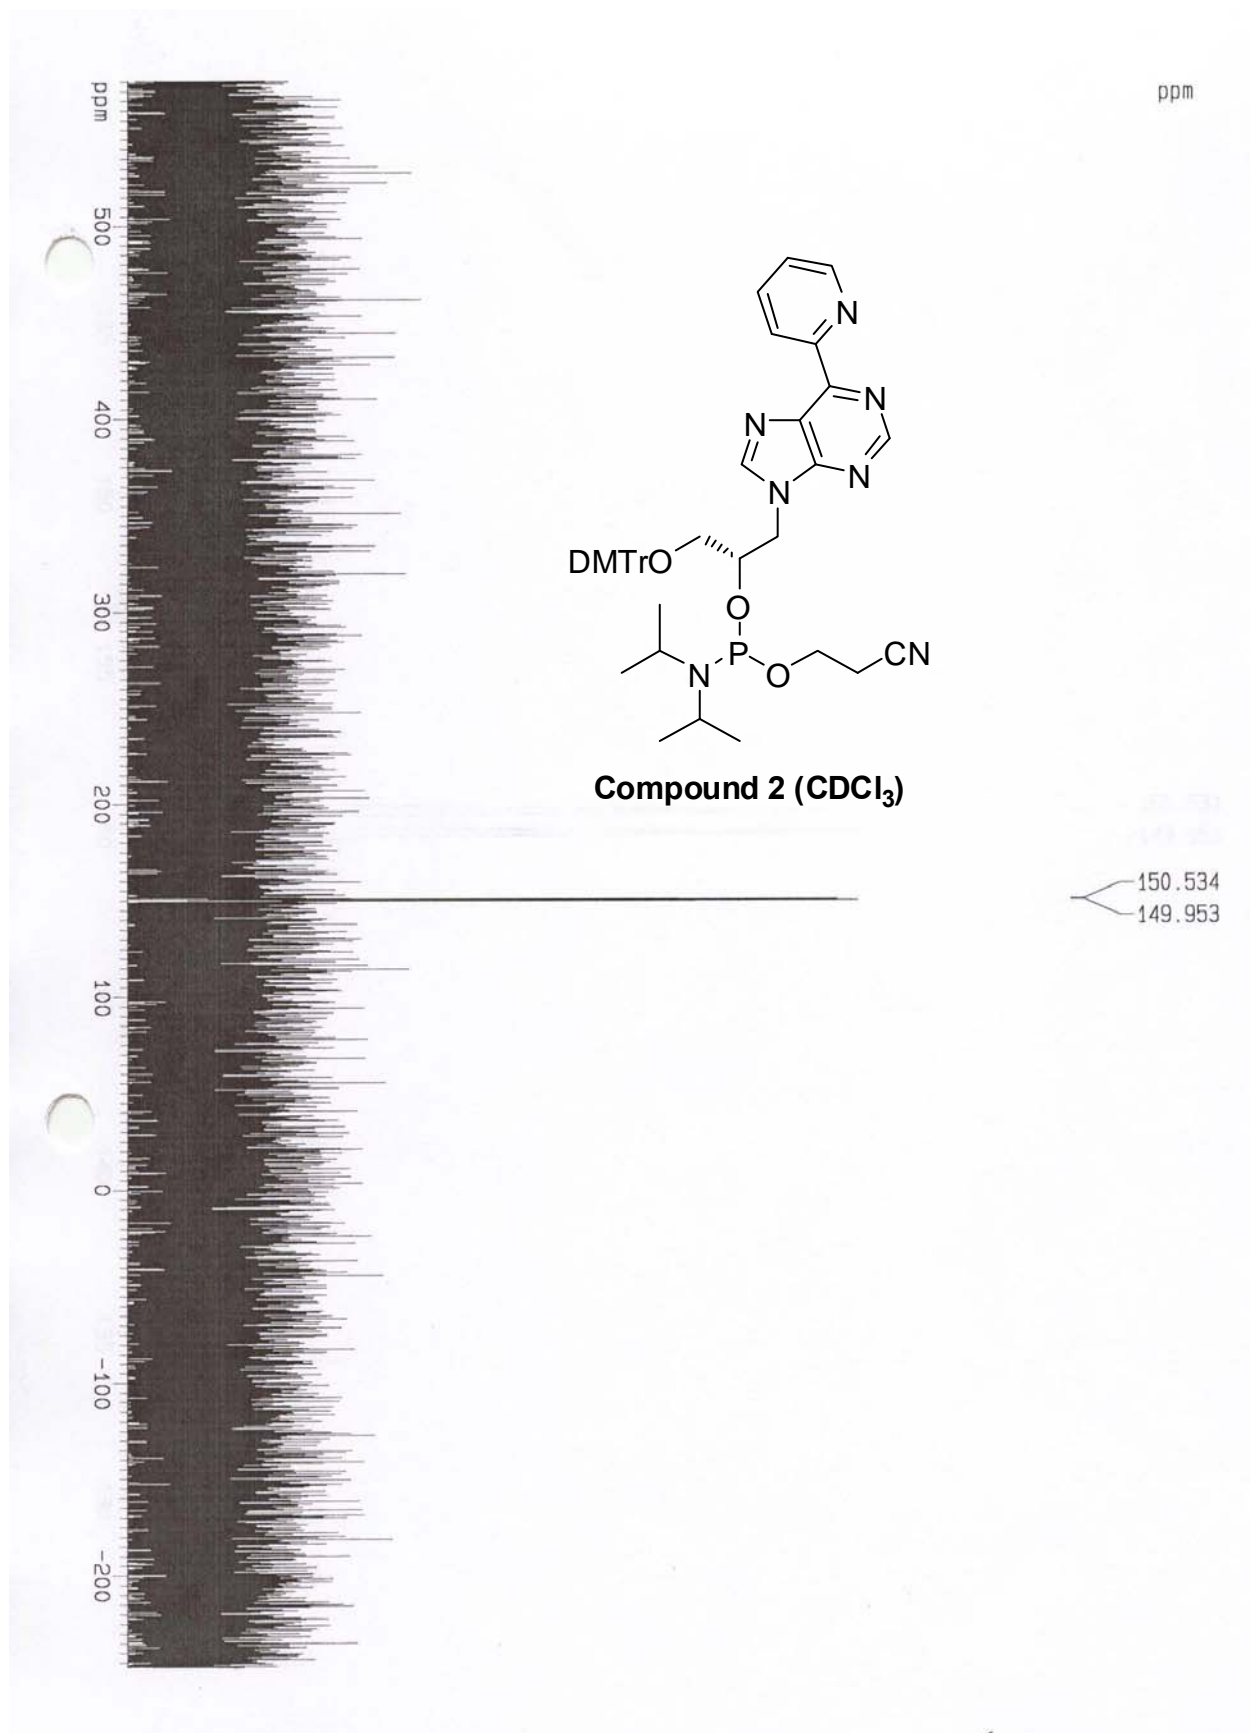

## 2.) GNA oligonucleotide synthesis and purification

GNA oligonucleotides were prepared on an ABI 394 DNA/RNA Synthesizer on a one micromole scale. GNA phosphoramidites (A, T, G, C, **1**, **2**) were used at a concentration of 100 mM with a standard protocol for 2-cyanoethyl phosphoramidites, except that the coupling was extended to 3 minutes (A, T, G, C), or 8 minutes (**1**, **2**). After the trityl-on synthesis, the resin was incubated with concentrated aqueous ammonia at 55-60 °C for 12 hours and then evaporated. The tritylated oligonucleotides were purified by C<sub>18</sub>-reversed-phase HPLC (Varian Dynamax 250 × 10 mm, Microsorb 300–10, C<sub>18</sub>) with aqueous triethylammonium acetate (50 mM TEAA) and acetonitrile as the eluent. The oligonucleotides were then detritylated with 80% acetic acid for 20 min and precipitated with *i*PrOH after the addition of 3 M sodium acetate. All oligonucleotides were finally purified at 55-60 °C using a Waters XTerra column (MS C18, 4.6 × 50 mm, 2.5 μm) with aqueous TEAA (50mM) and acetonitrile as the eluent. Purities were confirmed by HPLC as demonstrated with a representative trace in Figure S1. All identities were confirmed by MALDI-TOF MS (Table S1).

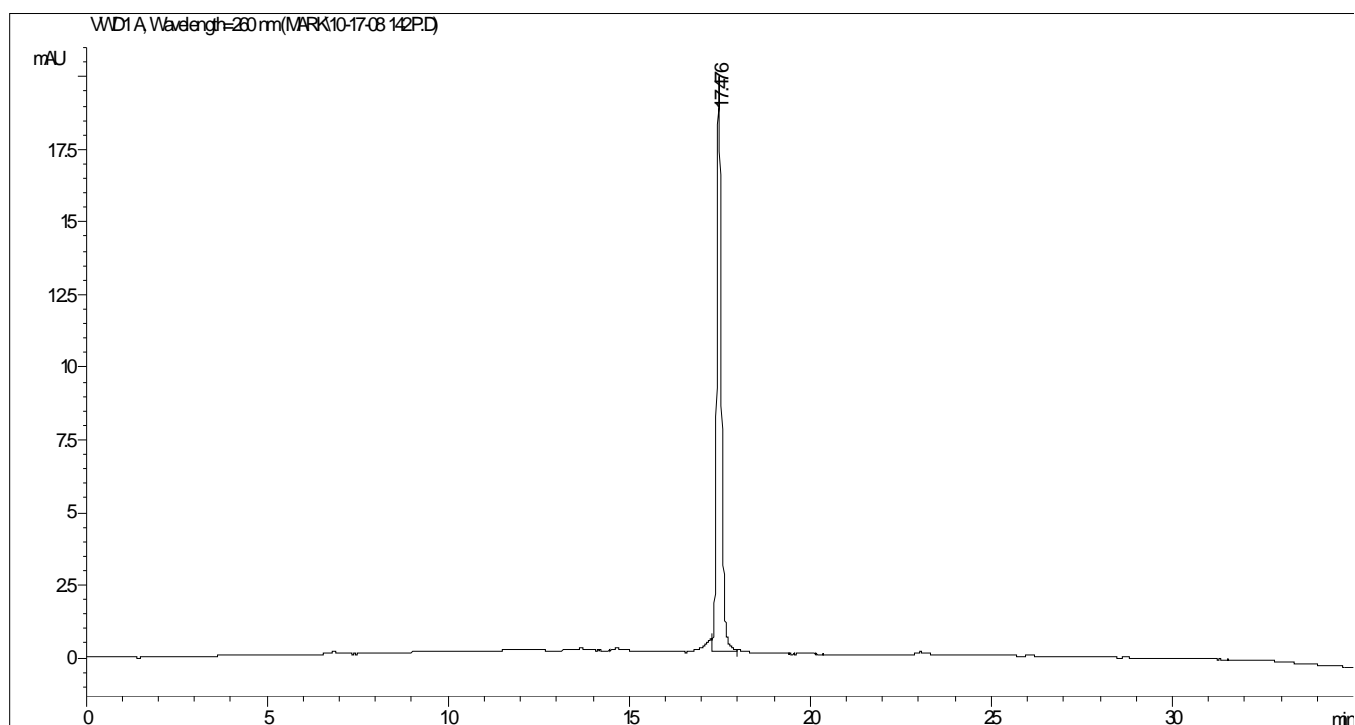

**Figure S1.** HPLC trace of the GNA sequence 3'-AAT ATT ATT ATT TTA-2'. The oligo was eluted with a linear gradient from 3-13% acetonitrile (97-87% TEAA) in 30 minutes. All GNA oligos were determined to be 98-100% pure by HPLC.

**Table S1.** Extinction coefficients and MALDI-TOF measured masses for all GNA oligonucleotides

| Sequence (3'→2')    | $\epsilon_{260}$ | Mass (calc) | Mass (measured) |
|---------------------|------------------|-------------|-----------------|
| AAT ATT ATT ATT TTA | 153630           | 3924        | 3924            |
| TAA AAT AAT AAT ATT | 171720           | 3951        | 3952            |
| AAT ATT AHT ATT TTA | 150606           | 3923        | 3925            |
| TAA AAT AHT AAT ATT | 162666           | 3941        | 3943            |
| AAT ATT APT ATT TTA | 159660           | 3994        | 3997            |
| TAA AAT APT AAT ATT | 171720           | 4012        | 4015            |
| TAA AAT ATT AAT ATT | 165690           | 3942        | 3941            |
